# Supplementary material
Source: PubMed Central journal article supplement (PMC5831402)
Supplement: NIHMS909461-supplement-supplement_1.pdf [file NIHMS909461-supplement-supplement_1.pdf]

Supplemental Materials

Supplemental Table 1. Environmental services personnel questionnaire.

|                                                         | Facility |          |                |          |         |          |
|---------------------------------------------------------|----------|----------|----------------|----------|---------|----------|
|                                                         | 1        | 2        | 3              | 4        | 5       | 6        |
| Length of employment, years                             | 3        | 1        | 14             | 13       | 2       | 3        |
| Number of rooms assigned/shift                          | 23       | 25       | 25             | 20       | 16      | 20       |
| Workload                                                | Too much | Too much | Fair           | Too much | Fair    | Too much |
| Frequency of training or in-services                    | Monthly  | Unknown  | Monthly or PRN | Monthly  | Monthly | PRN      |
| Is training relevant to your daily job responsibilities | No       | Yes      | Yes            | Yes      | Yes     | N/A      |
| Do you receive evaluation or feedback                   | Yes      | Yes      | Yes            | Yes      | Yes     | Yes      |

PRN, as needed.
